# Supplementary material for: Stereocomplexed physical hydrogels with high strength and tunable crystallizability
Source: Royal Society of Chemistry journal article supplement (doi:10.1039/c7sm01491k), 2017-01-01
Supplement: c7sm01491k1.pdf [file c7sm01491k1.pdf]

## Electronic Supplementary Information

### **Stereocomplexed physical hydrogels with high strength and tunable crystallizability**

Heqing Cao,<sup>a</sup> Xiaohua Chang,<sup>a</sup> Hailiang Mao,<sup>a</sup> Jian Zhou,<sup>a</sup> Zi Liang Wu,<sup>b</sup>

Guorong Shan,<sup>a</sup> Yongzhong Bao,<sup>a</sup> Pengju Pan<sup>\*,a</sup>

<sup>a</sup>State Key Laboratory of Chemical Engineering, College of Chemical and Biological Engineering, Zhejiang University, 38 Zheda Road, Hangzhou 310027, China.

<sup>b</sup>MOE Key Laboratory of Macromolecular Synthesis and Functionalization, Department of Polymer Science and Engineering, Zhejiang University, 38 Zheda Road, Hangzhou 310027, China

\*E-mail: [panpengju@zju.edu.cn](mailto:panpengju@zju.edu.cn)

## Measurements

The microstructure and morphology of dried hydrogels were characterized by scanning electron microscope (SEM) (SU 8010, Hitachi Co., Japan) at an accelerated voltage of 1 kV. The hydrogels were lyophilized and then sprayed with gold before the SEM analysis.

The surface morphology of swollen hydrogel film with a thickness of ~0.5 mm was measured by the atomic force microscope (AFM) (MFP-3D, Oxford Instruments, UK). The cantilever array of microscope probe worked in the tapping mode and the scanning size was  $0.2 \times 0.2 \mu\text{m}$ .

Surface morphology of swollen hydrogel film was investigated by polarized optical microscopy (POM) (Olympus Co., Japan) in a reflective mode. The thickness of hydrogel film was about 0.5 mm.

**Table S1.** Synthetic conditions and molecular weights of PLLA and PDLA macromonomers.

| Macromonomer | Lactide/HEMA<br>feed molar ratio | Yield<br>(%) | $M_n$<br>(g/mol) <sup>a</sup> | Degree of<br>Polymerization, $DP^a$ |
|--------------|----------------------------------|--------------|-------------------------------|-------------------------------------|
| PLLA         | 15:1                             | 91           | 2290                          | 30.2                                |
| PDLA         | 15:1                             | 90           | 2360                          | 31.4                                |

<sup>a</sup> $M_n$  and DP of macromonomers were determined from <sup>1</sup>H NMR.

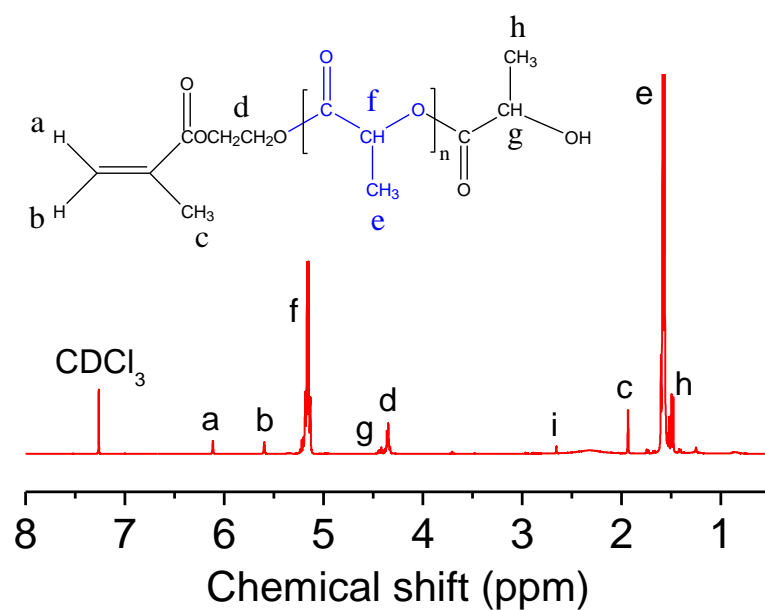

**Fig. S1.**  $^1\text{H}$  NMR spectrum of PLLA (DP = 30) macromonomer in  $\text{CDCl}_3$ .

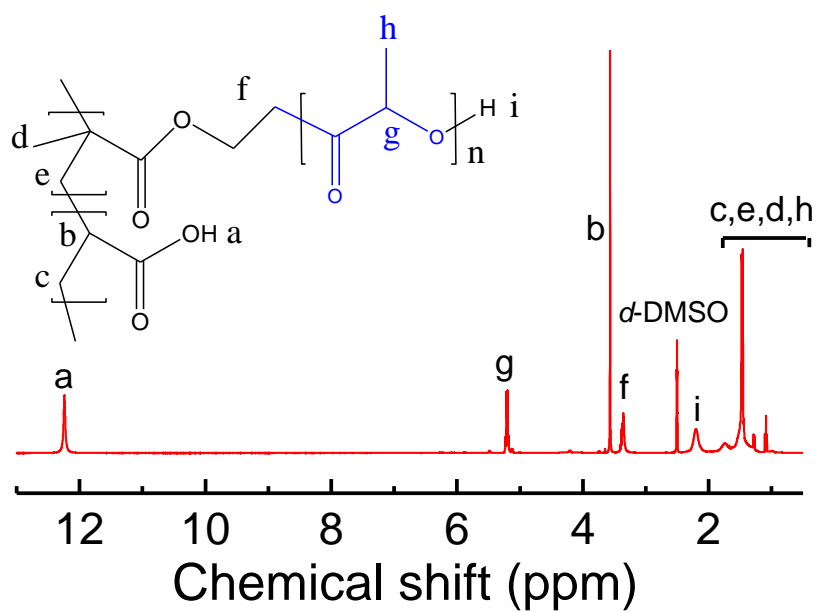

**Fig. S2.**  $^1\text{H}$  NMR spectrum of L-0.3 enantiopure copolymer in  $\text{DMSO}-d_6$ .

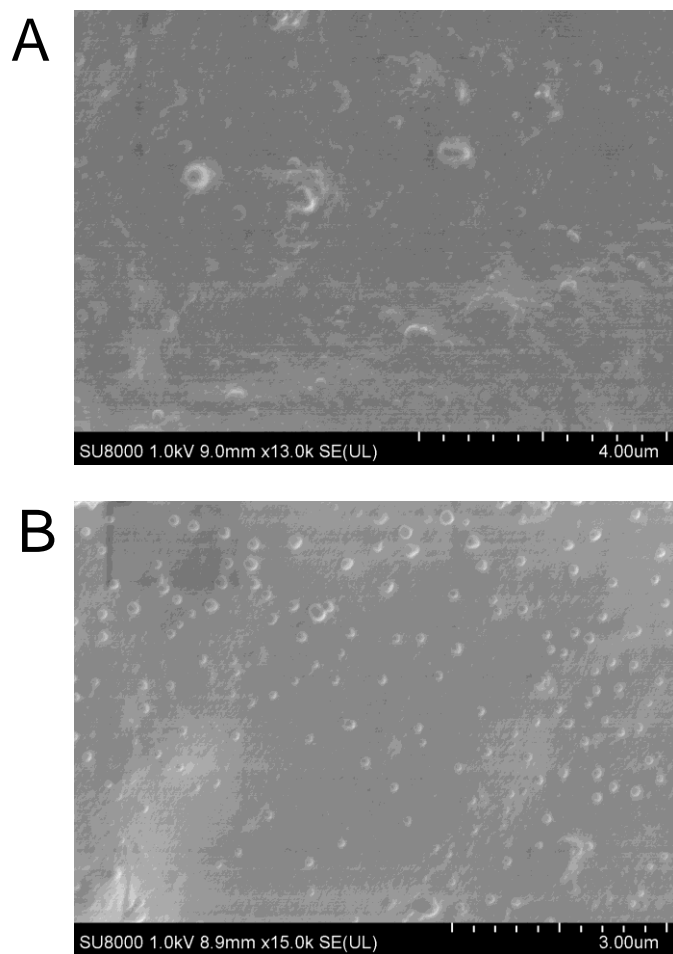

**Fig. S3.** SEM images of freeze-dried hydrogels. (A) L-0.2 enantiopure hydrogel. (B) L/D-0.2 racemic hydrogel. The scale bar is 500 nm.

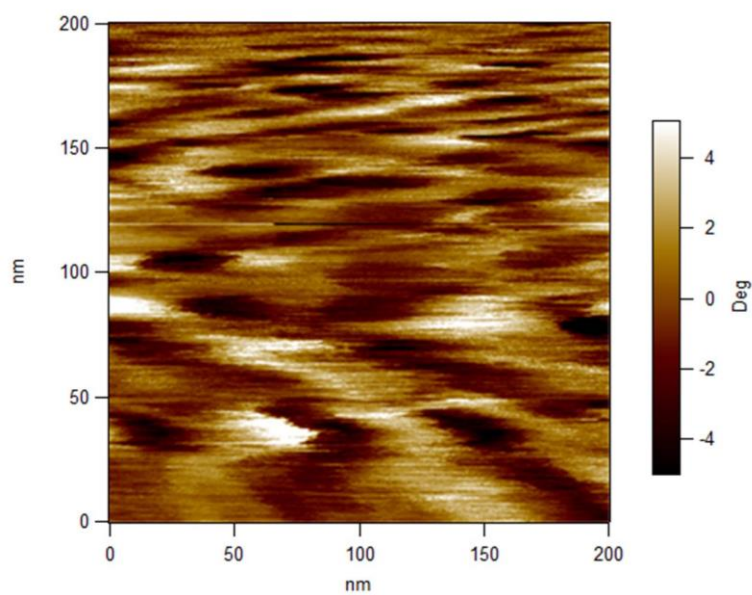

**Fig. S4.** AFM images of L/D-0.2 racemic hydrogel in the swollen state.
